# Supplementary material for: ArabidopsisRab-E GTPases exhibit a novel interaction with a plasma-membrane phosphatidylinositol-4-phosphate 5-kinase
Source: Oxford University Press journal article supplement (doi:10.1242/jcs.053488), 2009-11-11
Supplement: jcs053488-sup-053488-tables1.pdf [file jcs053488-sup-053488-tables1.pdf]

**Table S1. A summary of the plasmids and oligonucleotide primers used in this study**

| pENTR207 plasmid insert | Template DNA                                         | Primers                                                                                                      | pDEST plasmids          |
|-------------------------|------------------------------------------------------|--------------------------------------------------------------------------------------------------------------|-------------------------|
| RAB-A2a wt              | Total cDNA<br><i>Arabidopsis</i><br>seedlings        | A2.a-GW-F: 5'-(attB1)TTCACCATGGCGAGSSGACCGGACGAA-3'<br>A2.a-GW-R: 5'-(attB2)TCAAGACGATGAGCAACAAG-3'          | pAS2.1                  |
| RAB-A2d wt              | Total cDNA<br><i>Arabidopsis</i><br>seedlings        | A2.d-GW-F: 5'-(attB1)TTCACCATGGCGCATAGGGTAGAACAG-3'<br>A2.d-GW-R: 5'-(attB2)TTAAGTAGAGCAGCAACCTCT-3'         | pAS2.1                  |
| RAB-A5c wt              | Total cDNA<br><i>Arabidopsis</i><br>seedlings        | A5.c-GW-F: 5'-(attB1)TTCACCATGTCTAGACGACGACGAGAGA-3'<br>A5.c-GW-R: 5'-(attB2)TTACCTCGAACAGCAAGAGAAT-3'       | pAS2.1                  |
| RAB-B1b wt              | pcAlxs-1<br>(Moore et al.,<br>2007)                  | RABB1b-attB-F: 5'-(attB1)TTCACCATGGTCACCGTCGATGGACGC-3'<br>RABB1b-attB-R: 5'-(attB2)TTAACCACAACAGCCACCTCC-3' | pAS2.1,<br>pGEX-4T-1-GW |
| RAB-B1b QL              | pVKE6HA-Venus<br>-RABB1bQL*                          | RABB1b-attB-F: 5'-(attB1)TTCACCATGGTCACCGTCGATGGACGC-3'<br>RABB1b-attB-R: 5'-(attB2)TTAACCACAACAGCCACCTCC-3' | pAS2.1,<br>pGEX-4T-1-GW |
| RAB-D2a wt              | pVKE6-RABD2a<br>(Batoko et al,<br>2000)              | RABD2a-attB-F: 5'-(attB1)TTCACCATGAATCCTGAGTACGACTAT-3'<br>RABD2a-attB-R: 5'-(attB2)TCAAGTTGAGCAGCAGCCGTT-3' | pAS2.1                  |
| RAB-E1a wt              | Total cDNA<br><i>Arabidopsis</i> leaf                | RAB8-attB-F: 5'-(attB1)TAATGGCTGCTCCTCCTGCTAGA-3'<br>RAB8-attB-R: 5'-(attB2)TTATGTGCCGCAACATGCTGA-3'         | pAS2.1                  |
| RAB-E1b wt              | Total cDNA<br><i>Arabidopsis</i> leaf                | Ara3/Put3-attB-F: 5'-(attB1)TAATGGCTGCTCCACCTGCTAGA-3'<br>Ara3-attB-R: 5'-(attB2)TTAACTCCACAGCATGCAGA-3'     | pAS2.1                  |
| RAB-E1c wt              | Total cDNA<br><i>Arabidopsis</i> leaf                | Ara3/Put3-attB-F: 5'-(attB1)TAATGGCTGCTCCACCTGCTAGA-3'<br>Put3-attB-R: 5'-(attB2)TTAAGTTCCACAGCATGCAGA-3'    | pAS2.1                  |
| RAB-E1d wt              | pSK-RABE1d<br>(Zheng et al.,<br>2003)                | Put2-attB-F: 5'-(attB1)TAATGGCGGTTGCGCCGGCAAGA-3'<br>Put2-attB-R: 5'-(attB2)CTAAACGTAACCTACAGCAAGC-3'        | pAS2.1,<br>pACT2        |
| RAB-E1d ΔCC             | pGEM T-Easy-<br>RABE1dΔCC<br>(Zheng et al.,<br>2005) | Put2-attB-F: 5'-(attB1)TAATGGCGGTTGCGCCGGCAAGA-3'<br>UE11_noCC_GW-R: 5'-(attB2)CTAAACGTAACCTAGCTGACTTCTC-3'  | pAS2.1                  |
| RAB-E1d QL              | pGEM T-Easy -<br>RABE1dQL<br>(Zheng et al.,<br>2005) | Put2-attB-F: 5'-(attB1)TAATGGCGGTTGCGCCGGCAAGA-3'<br>Put2-attB-R: 5'-(attB2)CTAAACGTAACCTACAGCAAGC-3'        | pAS2.1,<br>pGEX-4T-1-GW |
| RAB-E1d SN              | pSK-RABE1dSN<br>(Zheng et al.,<br>2005)              | Put2-attB-F: 5'-(attB1)TAATGGCGGTTGCGCCGGCAAGA-3'<br>Put2-attB-R: 5'-(attB2)CTAAACGTAACCTACAGCAAGC-3'        | pAS2.1,<br>pGEX-4T-1-GW |
| RAB-E1d NI              | pSK-RABE1dNI<br>(Zheng et al.,<br>2003)              | Put2-attB-F: 5'-(attB1)TAATGGCGGTTGCGCCGGCAAGA-3'<br>Put2-attB-R: 5'-(attB2)CTAAACGTAACCTACAGCAAGC-3'        |                         |

|              |                                                                             |                                                                                                                                   |                                            |
|--------------|-----------------------------------------------------------------------------|-----------------------------------------------------------------------------------------------------------------------------------|--------------------------------------------|
| RAB E1e wt   | Total cDNA<br><i>Arabidopsis</i> leaf                                       | Put1-attB-F: 5'-(attB1)TAATGGCGGTTGCGCCGGCAAGA-3'<br>Put1-attB-R: 5'-(attB2)CTAAACATAACTGCAGCAAGC-3'                              | pAS2.1                                     |
| PI4Kb1       | Clone U21445<br>(ABRC DNA<br>stock center)                                  | PI4Kb1-GW-F: 5'-(attB1)TTCACCATGCCGATGGGACGCTTTCTA-3'<br>PI4Kb1-GW-R: 5'-(attB2)TCACAAATATCCATTTAAGAC-3'                          | pACT2                                      |
| PIP5K2 wt    | Total cDNA<br><i>Arabidopsis</i> leaf                                       | PIP5K-GW-F: 5'-<br>(attB1)TGGGCCCTCACCATGCGTGAACCGCTTGTTAGC-3'<br>PIP5K-GW-R: 5'-(attB2)TTA GCC GTC TTC GAT GAA GAT-3'            | pAS2.1, pACT2,<br>pB7WGF2,<br>pGEX-4T-1-GW |
| PIP5K2 MORN  | pENTR207-<br>PIP5K2                                                         | PIP5K-GW-F: 5'-<br>(attB1)TGGGCCCTCACCATGCGTGAACCGCTTGTTAGC-3'<br>Y2H40-3-GW-R: 5'-<br>(attB2)TTAGGTGGTGTGGTCTTAGAACCCCTCCGGTG-3' | pACT2,<br>pB7WGF2,<br>pGEX-4T-1-GW         |
| PIP5K2 ΔMORN | pENTR207-<br>ΔPIP5K2                                                        | PIP5K-GW-F: 5'-<br>(attB1)TGGGCCCTCACCATGCGTGAACCGCTTGTTAGC-3'<br>PIP5K-GW-R: 5'-(attB2)TTA GCC GTC TTC GAT GAA GAT-3'            | pACT2,<br>pB7WGF2,<br>pGEX-4T-1-GW         |
| GUS          | (Gateway BP<br>reaction positive<br>control,<br>Invitrogen,<br>Paisley, UK) | -                                                                                                                                 | pAS2.1, pACT2                              |

Note: (attB1) sequence: 5'-GGGGACAAGTTTGTACAAAAAAGCAGGC-3' and (attB2) sequence: 5'-GGGGACCACTTTGTACAAGAAAGCTGGGT-3' (Gateway, Invitrogen, Paisley, UK)

\*Gift of U. Neumann and C. Hawes, Oxford Brookes University.
