# Supplementary figures and images for: ArabidopsisRab-E GTPases exhibit a novel interaction with a plasma-membrane phosphatidylinositol-4-phosphate 5-kinase
Source: Oxford University Press journal article supplement (doi:10.1242/jcs.053488), 2009-11-11

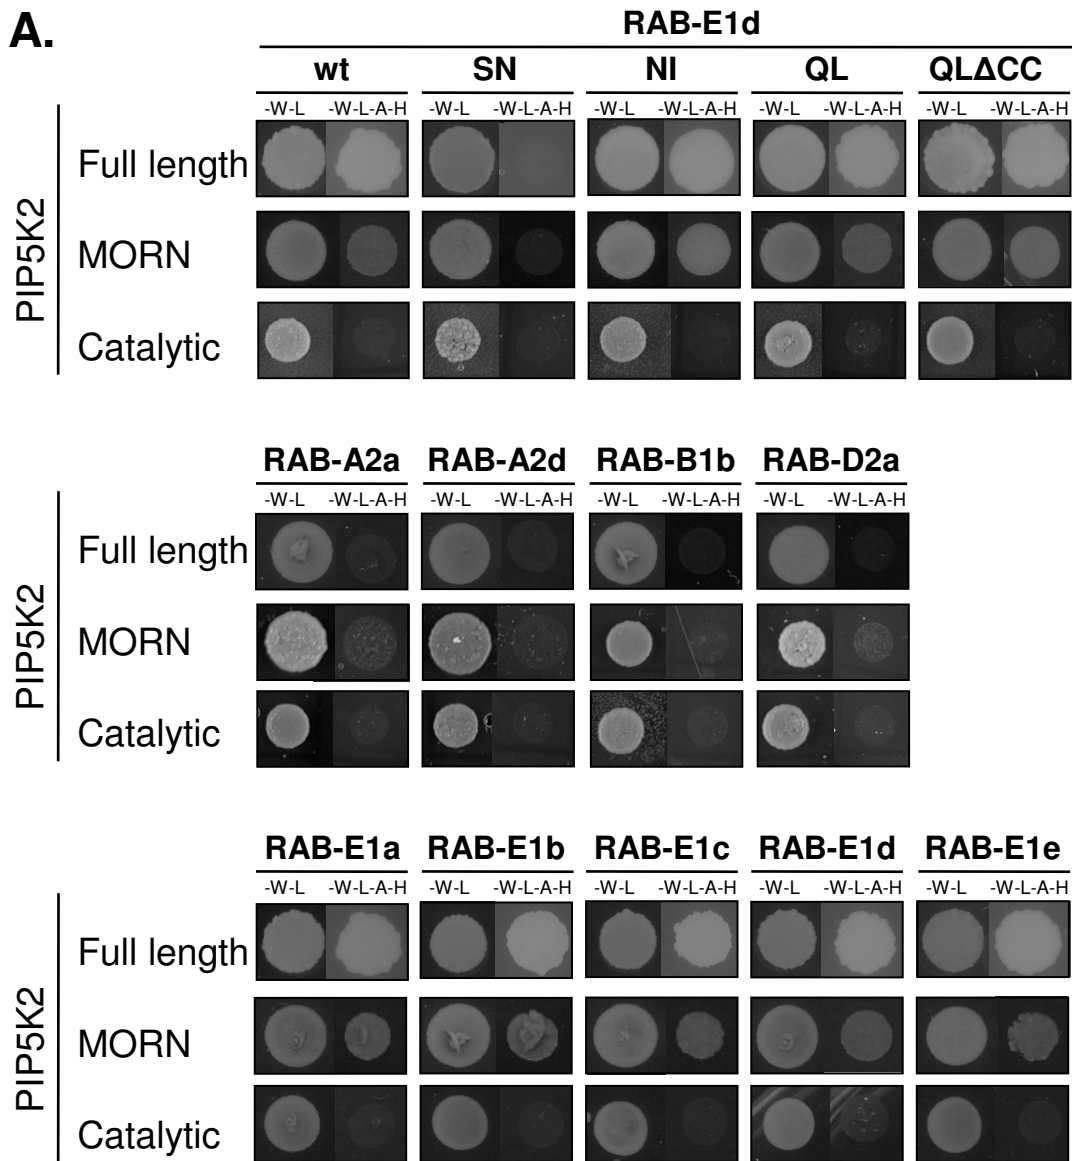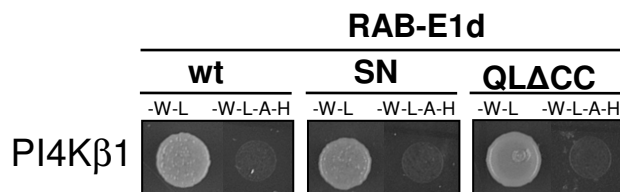

Supplement: jcs053488-sup-053488-figs1.pdf [file jcs053488-sup-053488-figs1.pdf]

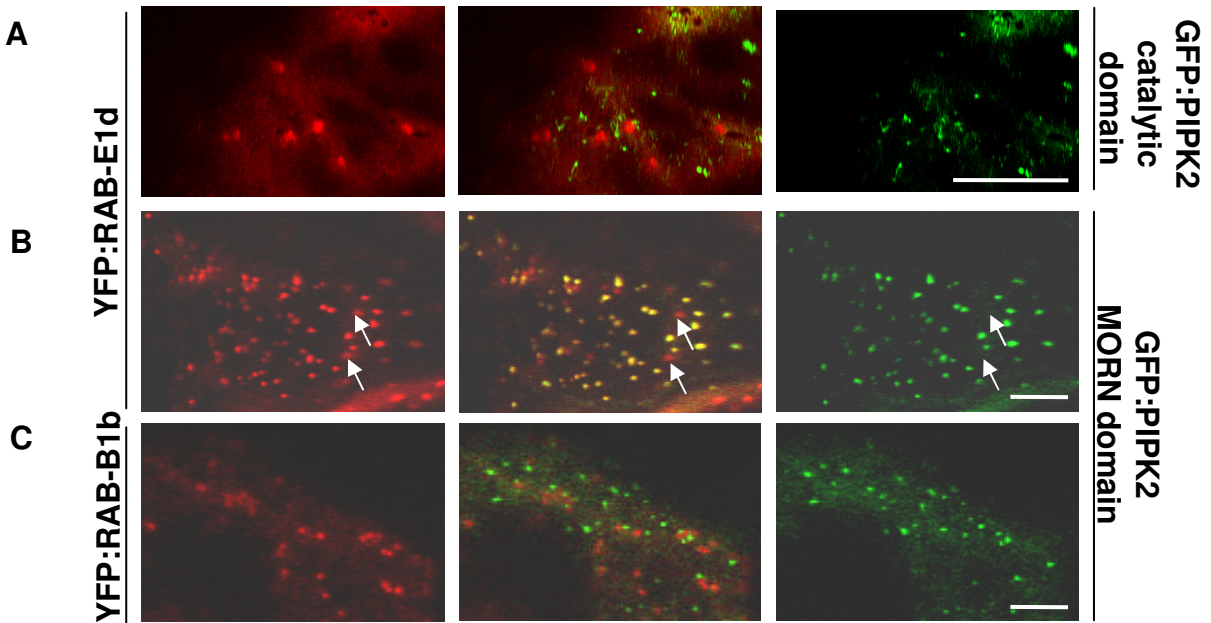

Bars = 10 $\mu$ m

Supplement: jcs053488-sup-053488-figs2.pdf [file jcs053488-sup-053488-figs2.pdf]

YFP:RAB-E1d

Wave27y (YFP:RAB-E1d)

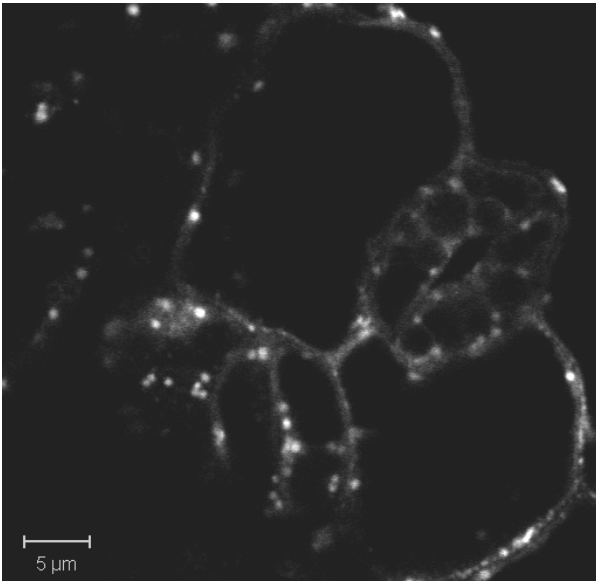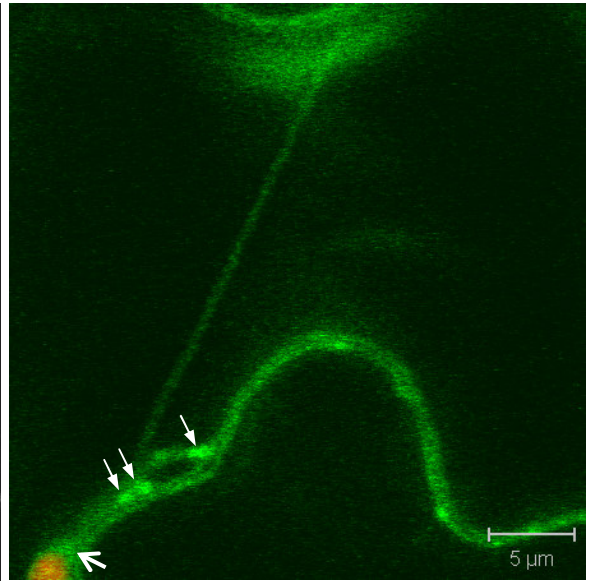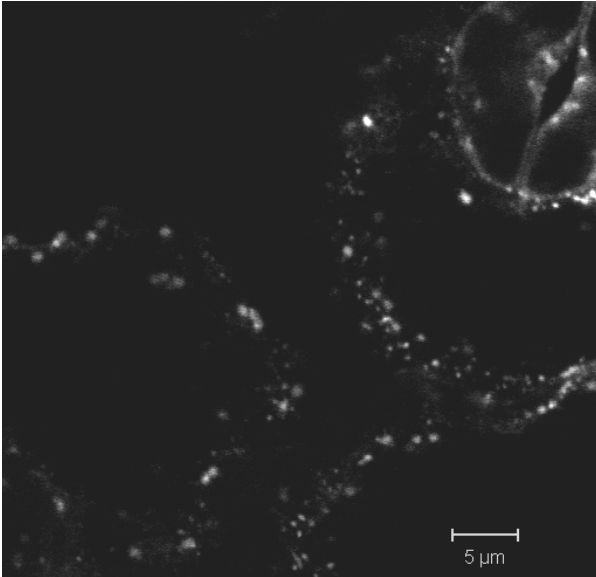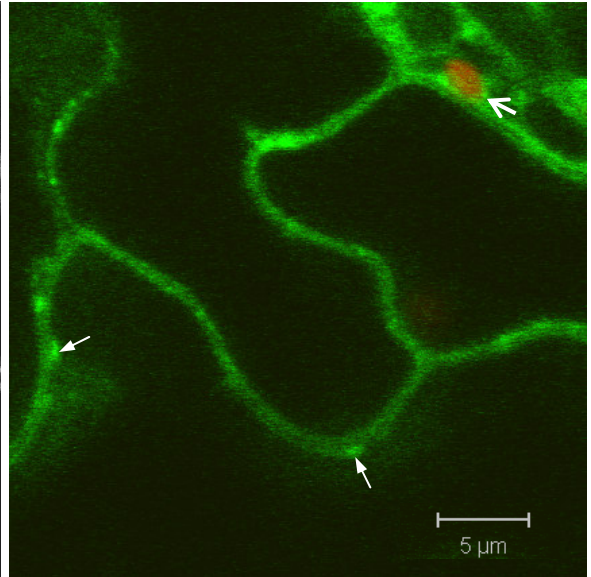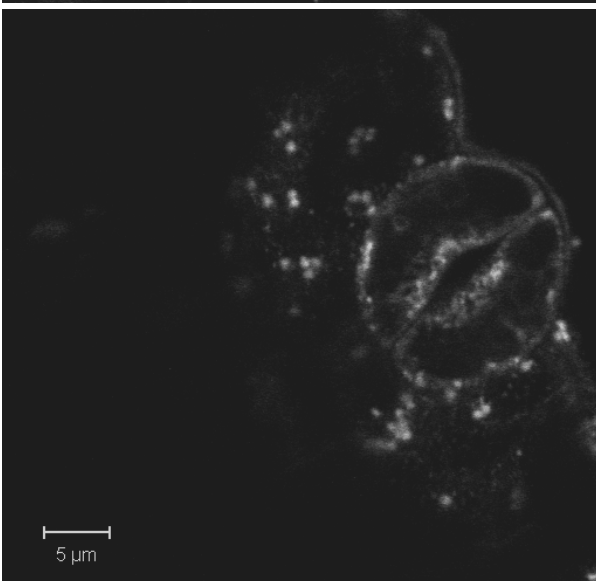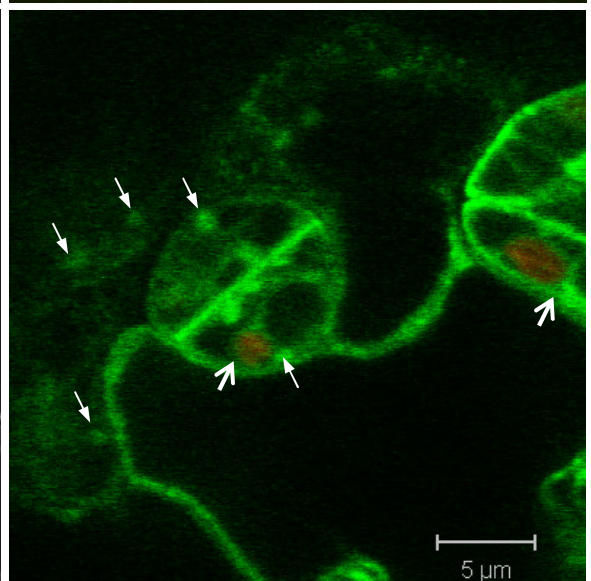

Supplement: jcs053488-sup-053488-figs3.pdf [file jcs053488-sup-053488-figs3.pdf]
